# Supplementary material
Source: Royal Society of Chemistry journal article supplement (doi:10.1039/d6fo00517a)
Supplement: d6fo00517a1.pdf [file d6fo00517a1.pdf]

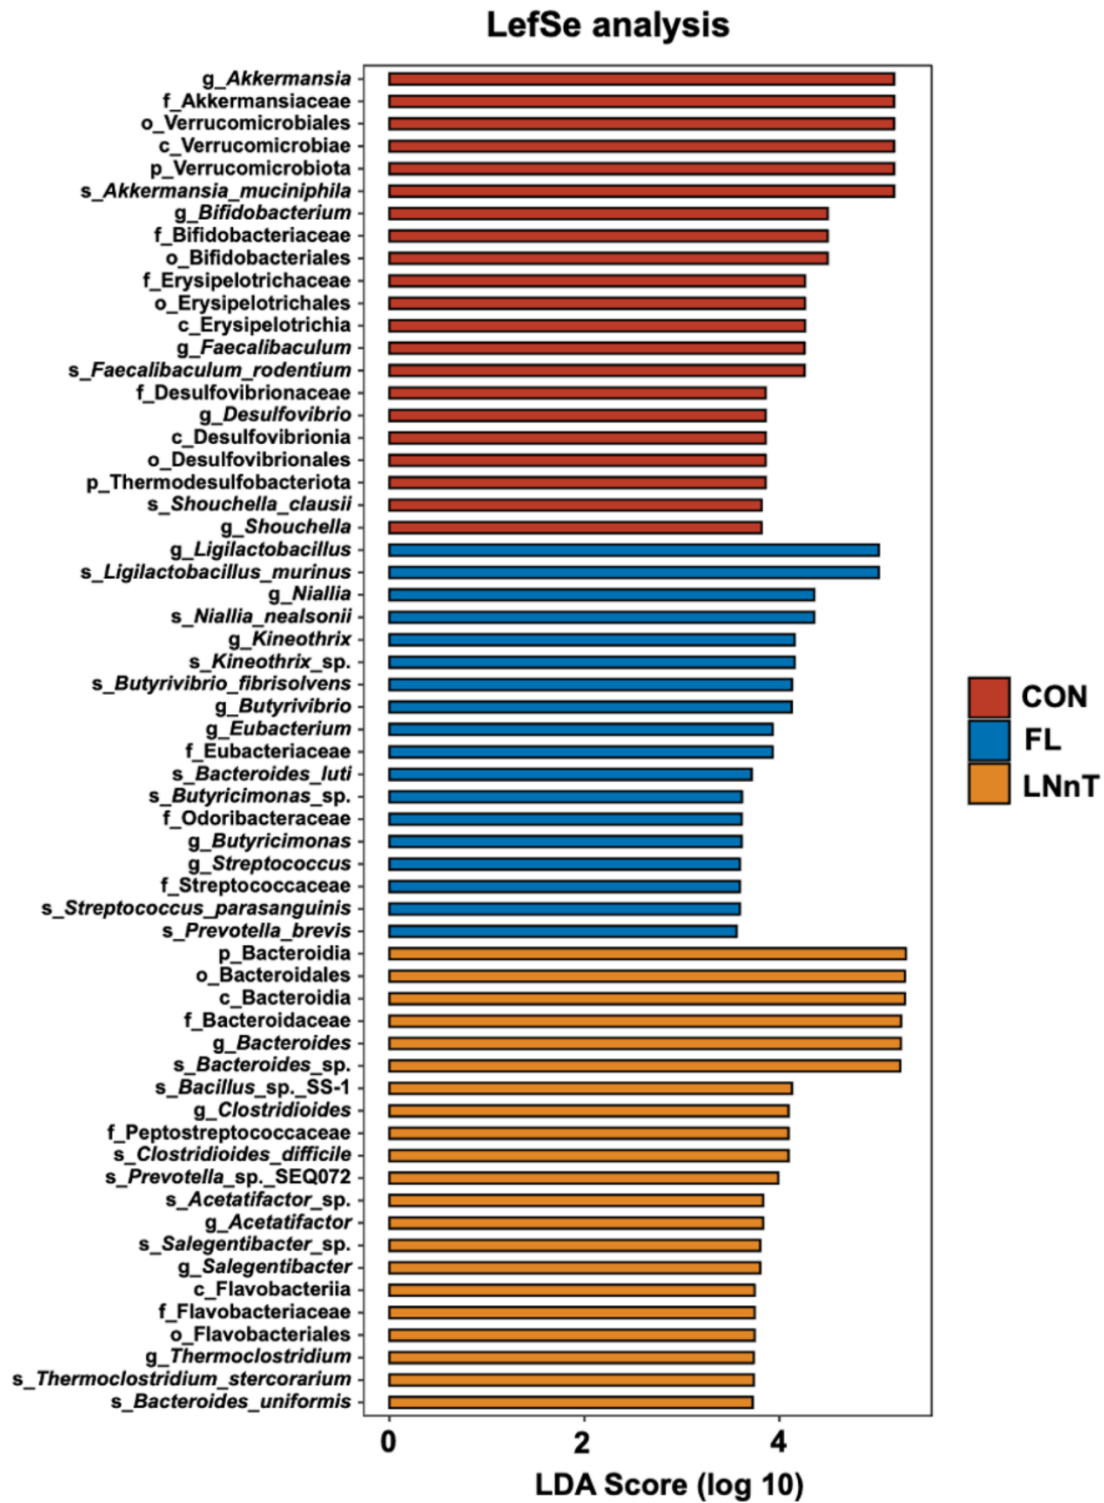

Fig. S1 Comparison of the relative abundance of small intestinal microbiota by LefSe.

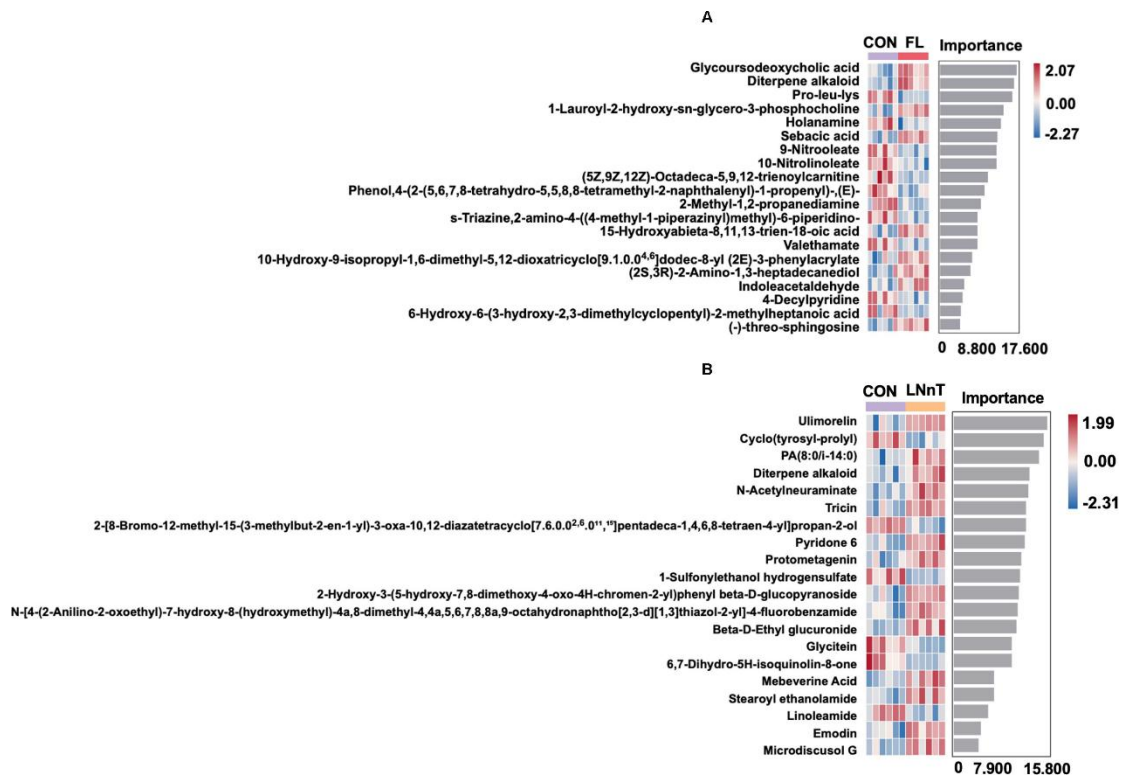

**Fig. S2** Feature importance ranking of metabolites. (A) and (B) show the metabolite importance ranking after 2'FL and LNnT treatment, respectively.

### Bacterial species and metabolites

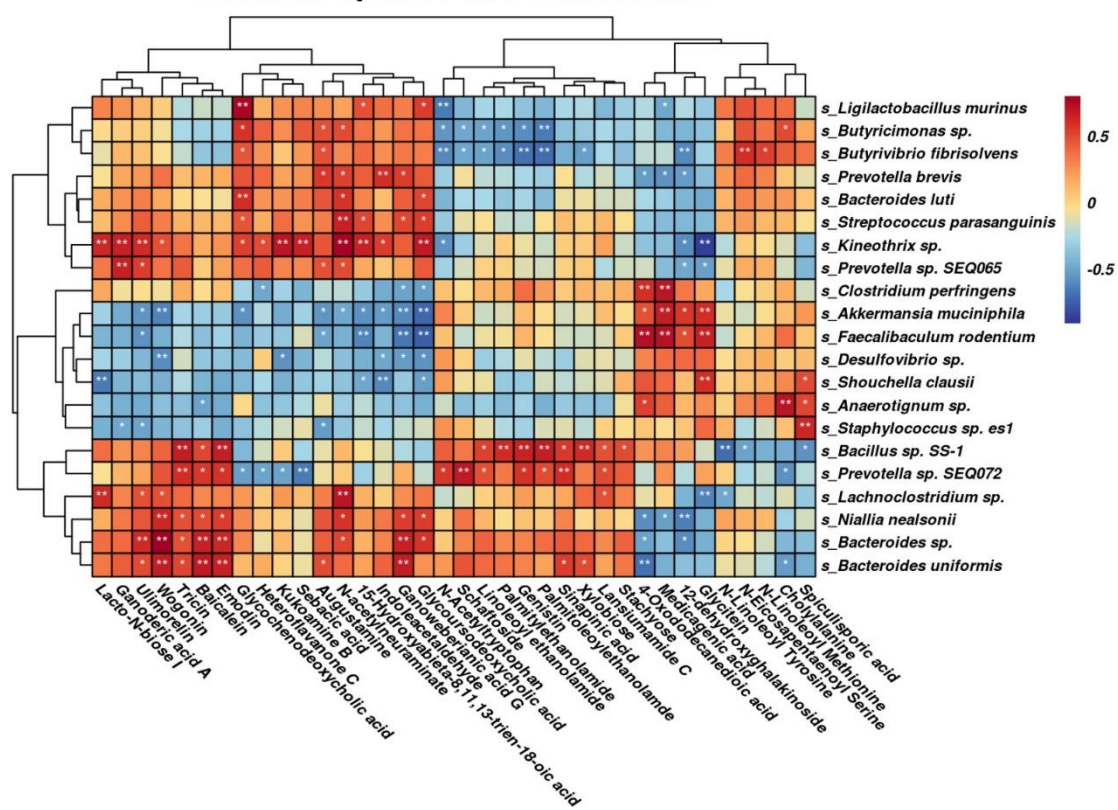

**Fig. S3** Spearman correlation between bacterial species and metabolites. \* $P < 0.05$ ,

\*\* $P < 0.01$ .
